# Chaperones facilitate heterologous expression of naturally evolved putative *de novo* proteins

Lars A. Eicholt<sup>1, §</sup>, Margaux Aubel<sup>1, §</sup>, Katrin Berk<sup>1</sup>, Erich Bornberg-Bauer<sup>1, 2</sup>, Andreas Lange<sup>1, \*</sup>

<sup>1</sup> Institute for Evolution and Biodiversity, University of Muenster, Germany

<sup>2</sup> Max Planck-Institute for Biology Tuebingen, Germany

§ these authors contributed equally

\* corresponding author: Andreas Lange, Huefferstraße 1, 48149 Muenster, Germany, Tel: +492518321086, [andreas.lange@wwu.de](mailto:andreas.lange@wwu.de)

## Abstract

Over the past decade, evidence has accumulated that new protein coding genes can emerge *de novo* from previously non-coding DNA. Most studies have focused on large scale computational predictions of *de novo* protein coding genes across a wide range of organisms. In contrast, experimental data concerning the folding and function of *de novo* proteins is scarce. This might be due to difficulties in handling *de novo* proteins *in vitro*, as most are predicted to be short and disordered. Here we propose a guideline for the effective expression of eukaryotic *de novo* proteins in *Escherichia coli*.

We used 11 sequences from *Drosophila melanogaster* and 10 from *Homo sapiens*, that are predicted *de novo* proteins from former studies, for heterologous expression. The candidate *de novo* proteins have varying secondary structure and disorder content. Using multiple combinations of purification tags, *E. coli* expression strains and chaperone systems, we were able to increase the number of solubly expressed putative *de novo* proteins from 30 % to 62 %. Our findings indicate that the best combination for expressing putative *de novo* proteins in *E.coli* is a GST-tag with T7 Express cells and co-expressed chaperones. We found that, overall, proteins with higher predicted disorder were easier to express.

## 1 Introduction

2 *De novo* genes originate from intergenic or non-coding DNA regions [[Tautz and Domazet-](#)  
3 [Lošo, 2011](#), [McLysaght and Hurst, 2016](#), [Schmitz and Bornberg-Bauer, 2017](#), [Van Oss and](#)  
4 [Carvunis, 2019](#), [Rödelsperger et al., 2019](#), [Bornberg-Bauer et al., 2021](#), [Heames et al.,](#)  
5 [2022](#)] in contrast to genes that emerge by duplication [[Liberles et al., 2011](#), [Ohno, 1970](#)] or  
6 rearrangement from existing gene fragments [[Bornberg-Bauer and Albà, 2013](#)]. Therefore,  
7 recent, true *de novo* genes have no precursor by definition and have not been subjected to  
8 selection for particular structures or functions for long, if at all. Due to their recent emer-  
9 gence, *de novo* genes tend to be shorter, evolve more rapidly and have lower expression  
10 than established genes [[Van Oss and Carvunis, 2019](#), [Schmitz and Bornberg-Bauer, 2017](#)].  
11 However, their short length and accelerated evolution hinder the reliable assignment of ho-  
12 mologs. By combining homology and synteny based approaches for *de novo* gene identifi-  
13 cation, the accurate origin of *de novo* genes can be detected [[Vakirlis et al., 2020](#)].

14 Several *de novo* protein-coding genes have been identified and confirmed across a wide  
15 range of eukaryotes [[Begun et al., 2006](#), [Cai et al., 2008](#), [Neme and Tautz, 2013](#), [McLysaght](#)  
16 [and Guerzoni, 2015](#), [Schlötterer, 2015](#), [Schmitz et al., 2018](#), [Vakirlis et al., 2018](#), [Prabh and](#)  
17 [Rödelsperger, 2019](#), [Zhang et al., 2019](#), [Heames et al., 2020](#), [Dowling et al., 2020](#)]. These  
18 *de novo* genes were mainly analysed with comparative genomics and transcriptomics. A  
19 recent study by [Grandchamp et al. \(2022\)](#) showed that proto-genes, an intermediate step  
20 in *de novo* gene emergence [[Domazet-Lošo et al., 2017](#)], may already contain gene-like  
21 structures like introns, whose number and position correspond to the genomic position of  
22 proto-gene emergence. However, without experimental evidence on structure and function,  
23 our evolutionary understanding of how *de novo* proteins emerge, is incomplete.

24 Difficulties in handling *de novo* proteins, together with the novelty of the research area, might  
25 be the reason for the lack of experimental studies on *de novo* proteins. So far only two *de*  
26 *nov*o proteins were expressed and characterised experimentally, Goddard (Gdrd) [[Lange](#)  
27 [et al., 2021](#)] and Bsc4 [[Bungard et al., 2017](#)]. In both cases the expressed *de novo* protein  
28 was difficult to analyse due to unstable or incorrect folding (Bsc4) or unusual behaviour in  
29 SDS-PAGE (Gdrd). Compared to well-studied proteins with expression and purification data  
30 available, *de novo* proteins tend to behave differently when using standard protocols.

31 Several studies, foremost some from the lab of Dan Tawfik [[Tokuriki and Tawfik, 2009a,b,c](#),

32 [Jackson et al., 2022](#)], inspired us to apply co-expression with chaperones to achieve sol-  
33 uble expression of *de novo* proteins. Since *de novo* proteins evolve rapidly by becoming  
34 coding from scratch, they probably lack a stable structural configuration and contain high  
35 amounts of disorder [[Van Oss and Carvunis, 2019](#), [Schmitz and Bornberg-Bauer, 2017](#)].  
36 Those properties determine the levels of soluble and insoluble fractions of a protein during  
37 *in vitro* experiments and could explain the obstacles faced during their expression [[Soskine](#)  
38 [and Tawfik, 2010](#), [Tretyachenko et al., 2017](#)]. On the other hand, it is not yet clear if *de*  
39 *novo* proteins undergo a similar hindrance in their native organism or only in the expression  
40 hosts [[Gasser et al., 2008](#)]. While Tawfik and colleagues used chaperones to explore the  
41 sequence space of enzymes and enable soluble expression of mutants [[Tokuriki and Tawfik,](#)  
42 [2009a,b,c](#)], we hypothesised that *de novo* protein expression might also profit from chaper-  
43 ones. With their "emergence from dark genomic matter" in the DNA [[Bornberg-Bauer et al.,](#)  
44 [2015](#)] and predicted lack of stability and high disorder, *de novo* proteins are prospective  
45 targets for for chaperones because their solubility can be increased. [[Tokuriki and Tawfik,](#)  
46 [2009a,b](#)]. Increased solubility can be relevant for protein purification and any follow-up ex-  
47 periments.

48 The chaperonin GroEL and its co-chaperone GroES are found throughout the bacterial do-  
49 main, while their homologs, HSP60 and HSP10, respectively, are found in eukaryotes [[Finka](#)  
50 [et al., 2016](#)]. GroEL/ GroES play a pivotal role in the translocation, dis-aggregation, function  
51 and folding of newly synthesised peptides after translation [[Tokuriki and Tawfik, 2009a](#), [Finka](#)  
52 [et al., 2016](#), [Libich et al., 2015](#), [Lin et al., 2008](#)].

53 The other chaperone system used here is DnaK, DnaJ and GrpE (homologous to HSP70  
54 and HSP40 in eukaryotes). For simplicity we will refer to the chaperone system GroEL/  
55 GroES as only GroEL and to DnaK, DnaJ and GrpE as DnaK only. While the GroEL system  
56 targets misfolded and unfolded proteins, DnaK can refold an already aggregated protein to  
57 its native state using ATP (see **Figure 1**) [[Schröder et al., 1993](#), [Sharma et al., 2010](#), [Kim](#)  
58 [et al., 2013](#), [Mashaghi et al., 2016](#)]. The two different chaperone systems can be exploited  
59 for challenging heterologous expression of proteins which are foreign to the host, and thus  
60 prevent misfolding and aggregation which is often associated with heterologous expression  
61 [[Goloubinoff et al., 1989](#), [Finka et al., 2016](#), [Kim et al., 2013](#), [Tokuriki and Tawfik, 2009a,b,c](#)].  
62 For this study, we used **21** putative *de novo* proteins, 11 from *Drosophila melanogaster*  
63 (termed here as *DM1-10* and *Atlas*) and 10 from *Homo sapiens* (termed here as *HS1-10*)



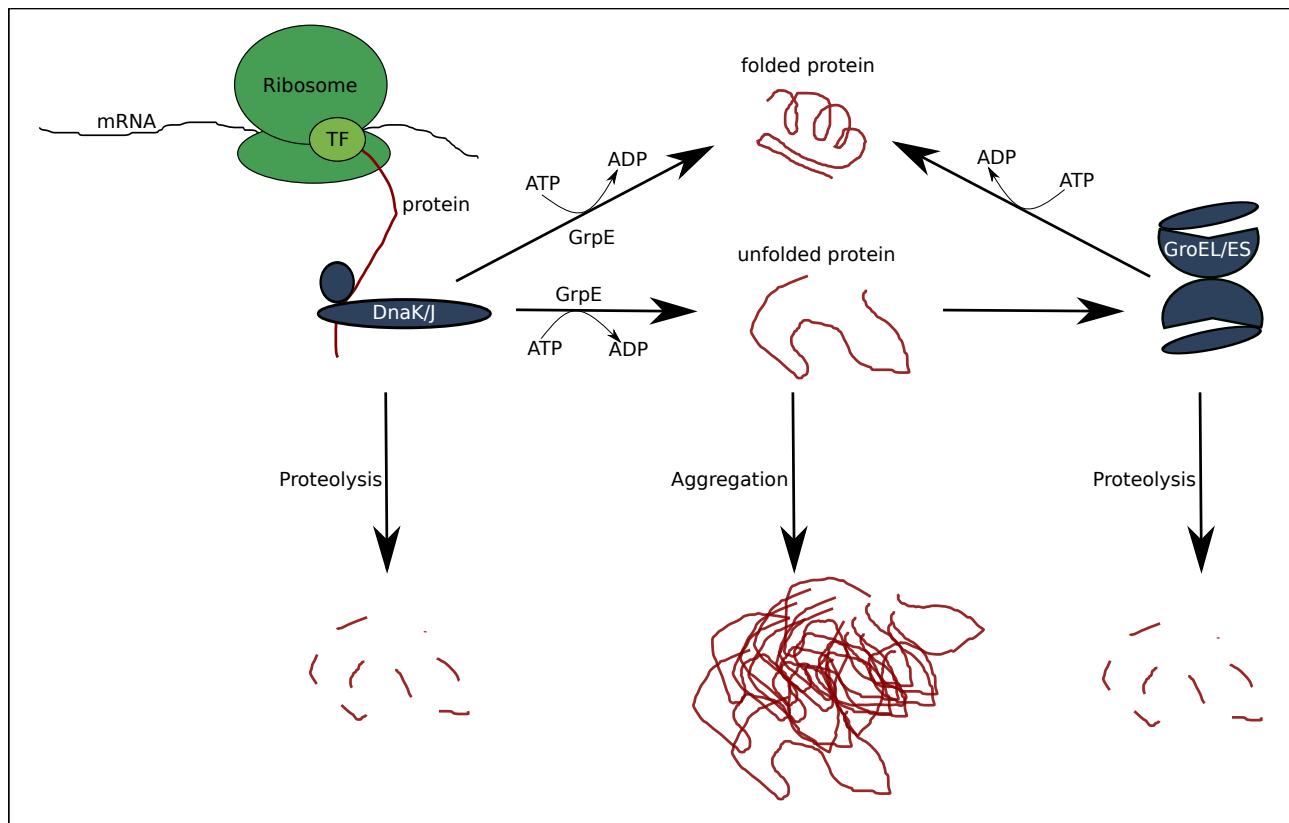

**Figure 1:** Mechanism of chaperone assisted protein folding after Thomas et al. [Thomas et al., 1997]. The nascent protein is bound by the DnaK/J complex and release is triggered by GrpE under ATP hydrolysis. After release, the protein is either correctly folded, degraded (proteolysis) or remains unfolded. The unfolded protein can either aggregate or bind to the GroEL/ES complex. GroEL/ES either releases the folded protein by ATP hydrolysis or the protein is degraded.

64 as shown in **Figure 2**. These *de novo* proteins have been recently published by Heames *et*  
65 *al.* and Dowling *et al.* Additionally, we tested our method on a recently published and better  
66 characterised putative *de novo* protein from *D. melanogaster*, called Atlas. Atlas appears  
67 to function as a DNA binding protein that facilitates the packaging of chromatin in devel-  
68 oping *D. melanogaster* sperm [Rivard et al., 2021]. Since experimental work with *de novo*  
69 proteins is still underrepresented (compared to computational studies) and challenging, we  
70 want to propose a guideline for successful expression of putative *de novo* proteins in *E. coli*.  
71 We combined different chaperone systems (GroEL and DnaK) with different combinations  
72 of *E. coli* strains (BL21 Star™ (DE3) and T7 Express) in order to express putative *de novo*  
73 proteins solubly. To verify successful expression of target proteins, western blots were per-  
74 formed and samples sent for tryptic digest followed by mass spectrometry. We identified the  
75 best combination for expression of putative *de novo* proteins in *E. coli* and increased the  
76 total number of solubly expressed putative *de novo* proteins to 62 % (13/21 proteins). The

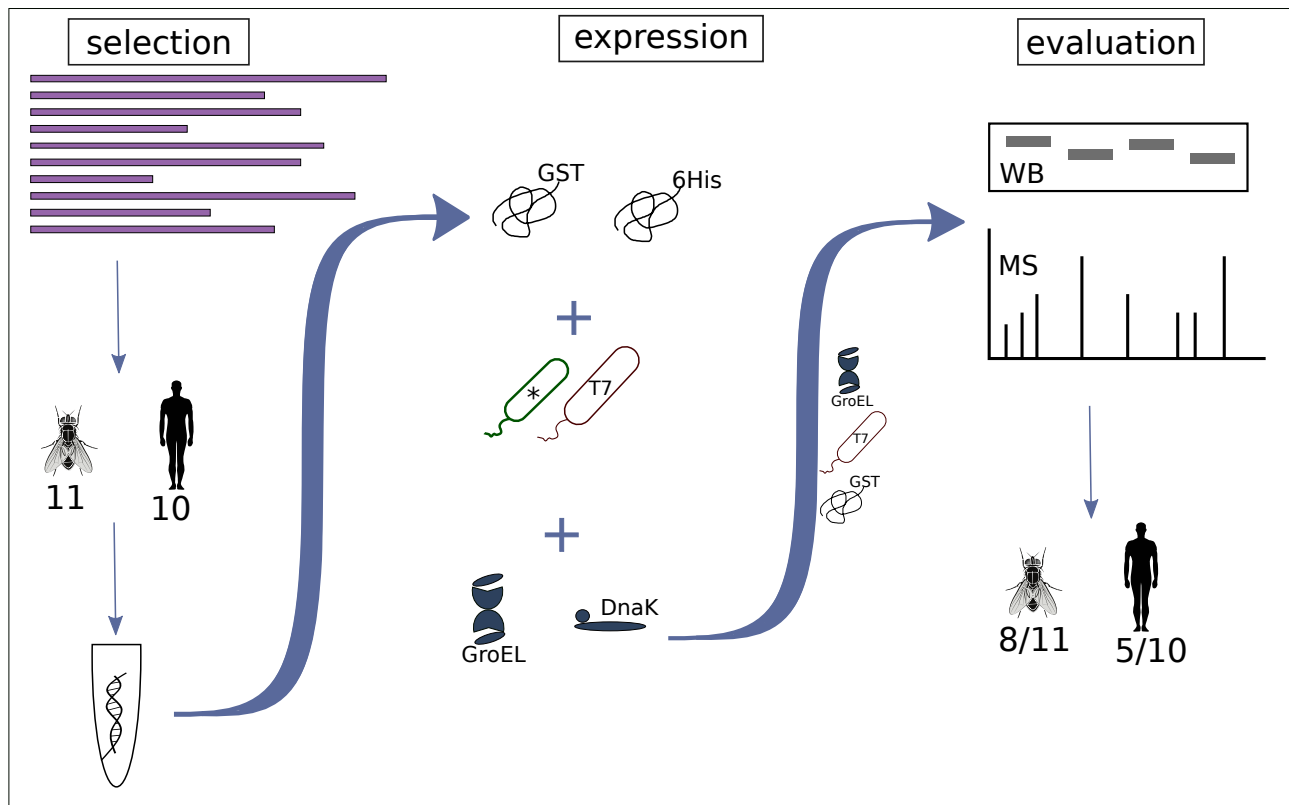

**Figure 2: Overview of the workflow on *de novo* protein expression:** We first selected candidate proteins from *Drosophila melanogaster* (11, including Atlas) and 10 from *Homo sapiens* from a pool of putative *de novo* genes for expression. The 21 sequences were codon optimised for *E. coli* and ordered from Twist. For expression, different tags (GST and His), different *E. coli* expression cells (star, T7) and different chaperones (GroEL and DnaK systems) were tested. The success of protein expression was verified by western blot (WB) and mass spectrometry (MS). With the help of GST-tag and chaperone system GroEL using specialised T7 express cells, we could express around 50 % of the candidate *de novo* proteins solubly.

- 77 different chaperone systems increased or enabled soluble expression in four cases (31 %),  
78 while DnaK only helped in two, GroEL in all of those four.

## 79 Results

### 80 Structural content of the putative *de novo* proteins

#### 81 Disorder Predictions

82 We performed disorder predictions with IUPred2a [Erdős and Dosztányi, 2020, Mészáros  
83 et al., 2018] on all candidate *de novo* proteins. For this we calculated the percentage of  
84 residues predicted to be disordered (Figure 3), as opposed to the overall average disorder  
85 score (Figure S1). This allows direct comparison to secondary structure predictions (Figure  
86 4). Our first objective here was to choose candidate *de novo* proteins with different levels  
87 of intrinsic disorder to observe any difference in their ability to express. If any trend in  
88 predicted disorder and soluble expression or susceptibility to chaperones was observed,  
89 this could help choosing promising candidates for characterisation in future experiments.  
90 The predicted disorder ranged from around 3 % to 100 % as shown in Figure 3. DM5 was  
91 predicted to have least disorder content, while DM6, DM3, HS10 and DM8 appear to be  
92 entirely disordered. The putative *de novo* protein Atlas has predicted disorder of around 60  
%.

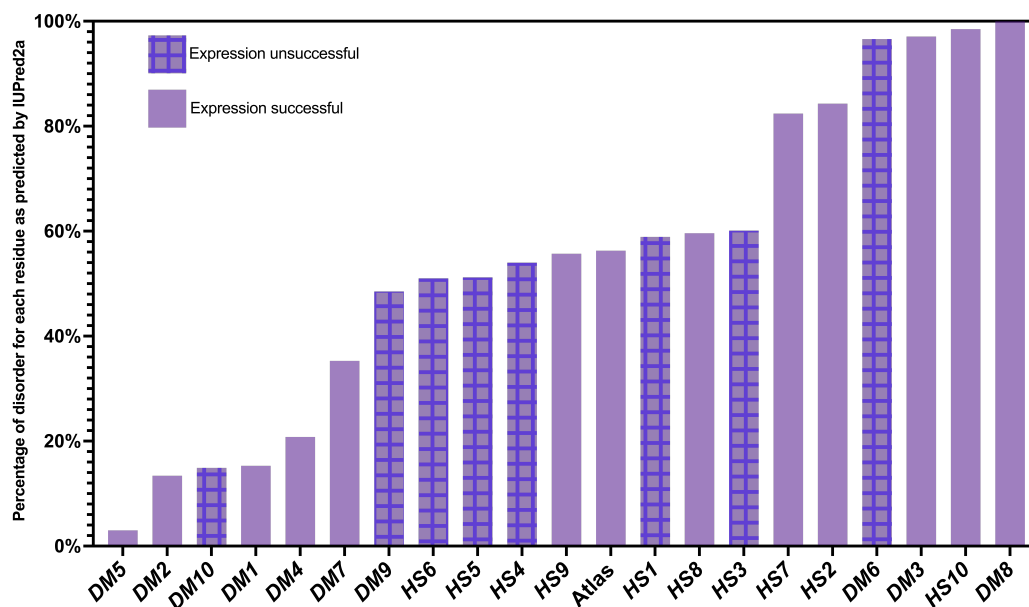

**Figure 3:** Percentage of disorder as calculated with IUPred2a. All candidate *de novo* proteins used for expression experiments ordered by their disorder level from left to right. Unicolor bars belong to the successfully expressed proteins, checked bars to the unsuccessful ones.

## 94 Secondary Structure Predictions

95 Predictions of secondary structure elements were performed using Porter 5.0 [Torrise et al.,  
 96 2018, 2019] for all candidate proteins and are shown in **Figure 4**. While the results indicate  
 97 a high amount of random coils for most candidates, they do not completely follow the trend of  
 98 the disorder predictions by IUPred2a (compare **Figure 3**). *DM3* for example, is predicted to  
 99 be ~ 100 % disordered by IUPred2a, while its on the other hand predicted to have over 20 %  
 100  $\beta$ -sheet and ~ 70 % random coils by Porter 5.0. Our goal was to choose a cohort of *de novo*  
 101 proteins that consist of a diverse range in composition of structural elements. We assumed  
 102 that a protein containing more secondary structure elements should be better accessible  
 103 for soluble expression with chaperones. Notably, *DM1*, *DM2*, *DM4*, *DM5* and *DM10* are  
 104 predicted to have secondary structure contents of 50 % or more, with  $\alpha$ -helices to be more  
 105 frequent than  $\beta$ -sheets. *HS4*, *HS5*, *HS6*; *HS7*, *DM3* and *DM7*, on the other hand, are  
 106 predicted to be mostly random coils (disordered) with otherwise high amounts of  $\beta$ -sheets  
 107 predicted.

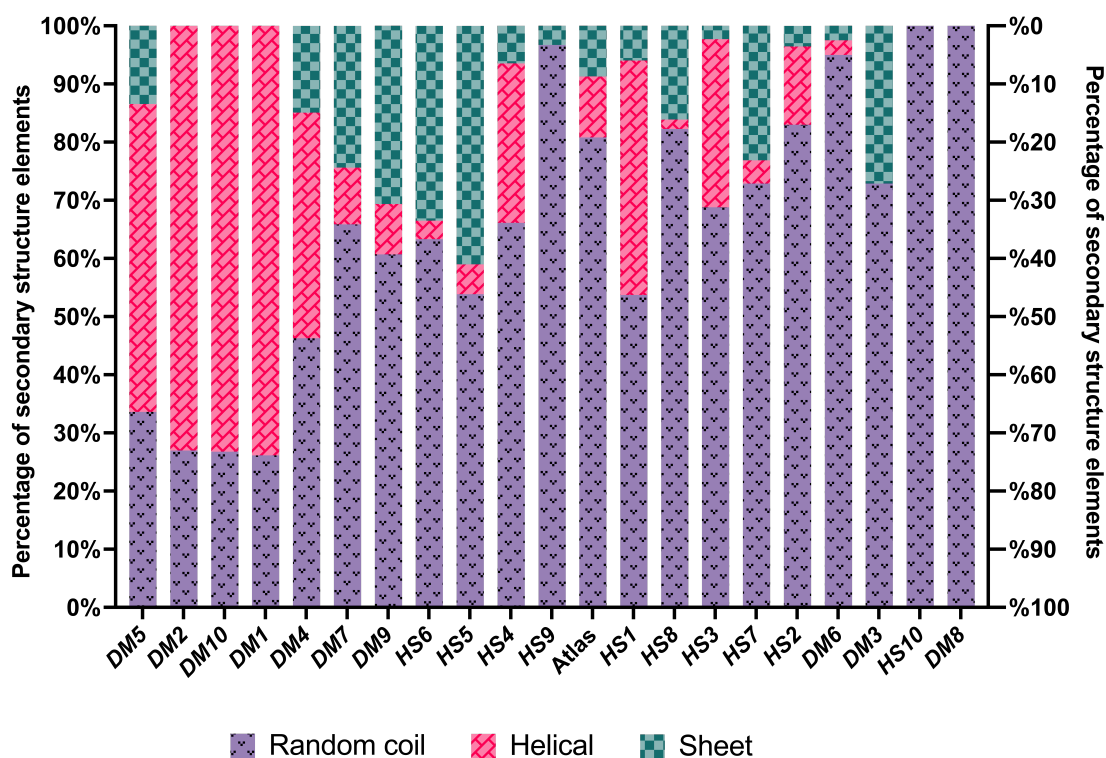

**Figure 4:** Percentage of random coils,  $\alpha$ -helices and  $\beta$ -sheets predicted by Porter 5.0 for each *de novo* protein candidate. Left to right following increasing disorder level based on **Figure 3**.

## 108 Expression of putative *de novo* proteins

### 109 Candidates of *Drosophila melanogaster*

110 Our initial approach was similar to the successful expression of characterised putative *de*  
111 *novo* protein Gdrd [Lange et al., 2021]. Therefore, we aimed to express our 11 putative *de*  
112 *novo* protein candidates with an N-terminal 6x His-tag in *E. coli* BL21 Star™ (DE3) cells,  
113 and verify expression via SDS-PAGE and mass spectrometry. However, for our candidates  
114 the expression level was either very low or not detectable, as can be seen in **Figure S3**. We  
115 switched to different *E. coli* cells (T7 Express), but expression remained unsuccessful. Shift-  
116 ing from an N-terminal 6xHis-Tag to a C-terminal 6xHis-tag showed similar negative results.  
117 Considering the size and levels of disorder, we switched to a larger tag for increased solu-  
118 bility and stability, choosing an N-terminal GST-tag. In this way we were able to observe a  
119 higher success rate in soluble expression of our target proteins. But not all proteins could be  
120 expressed at satisfying levels, especially solubility needed to be increased for some (**Figure**  
121 **S3**).

122 Inspired by successful work carried out by Tawfik *et al.* (2009a, 2009b, 2009c) we hypothe-  
123 sised that chaperones could improve thermodynamic stability of these evolutionarily young  
124 proteins thus enabling their soluble expression. We repeated our experiments with the ad-  
125 dition of the two chaperone systems i) GroEL and ii) DnaK. We were able to increase the  
126 number of solubly expressed *de novo* candidate proteins of *D. melanogaster* using the com-  
127 bination of either GroEL or DnaK and N-terminal GST-tag (see **Figure 5**). However, for the  
128 candidate proteins *DM6*, *DM9*, and *DM10* no soluble expression was achievable, despite  
129 the use of different tags, strains, or chaperones. Only in the case of Atlas, the combination  
130 of N-terminal 6x His-tag and GroEL worked best. We tested all combinations in BL21 Star™  
131 (DE3) and T7 Express *E.coli* cells. Six candidate proteins were expressed in T7, two were  
132 expressed in BL21 Star™ (DE3) cells. Three proteins were not expressable in either strain.  
133 In summary, with the combination of chaperones and switching to N-terminal GST-tag, we  
134 were able to express 73 % of the *D. melanogaster* putative *de novo* protein candidates (see  
135 **Table 1**).

136

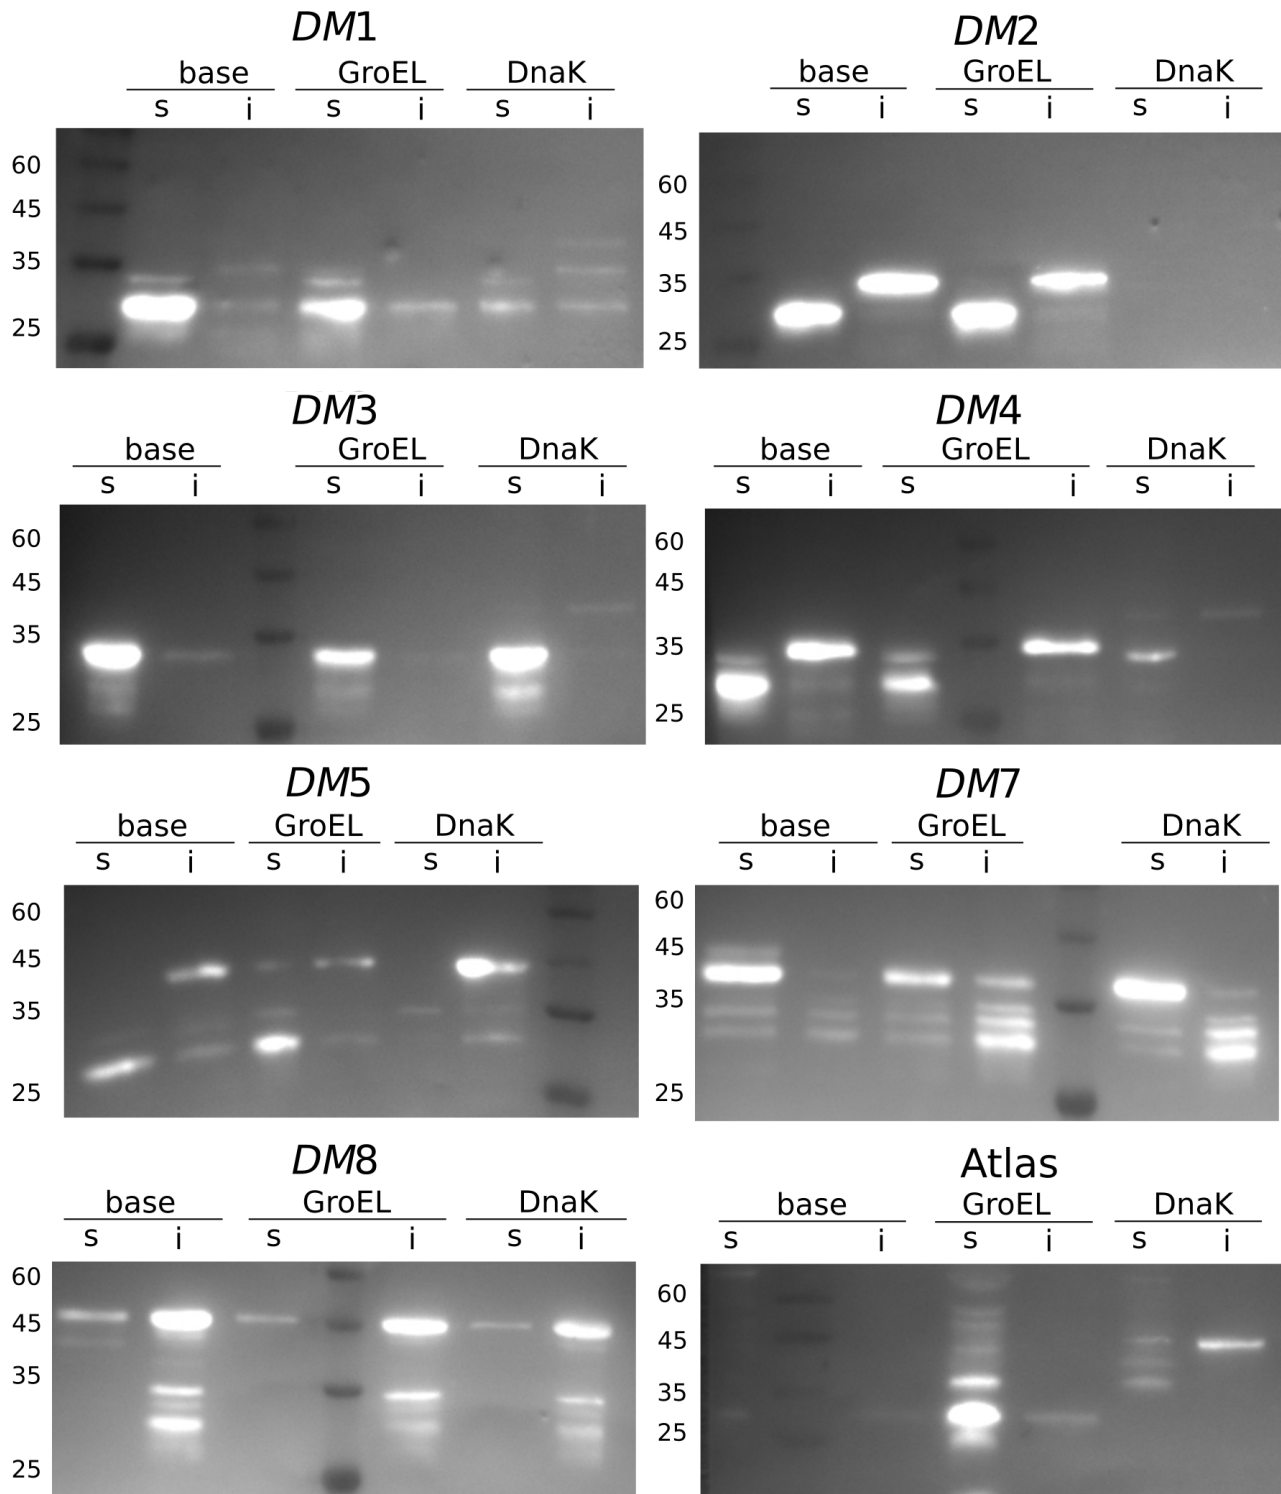

**Figure 5:** Western blots with Anti-His antibody: **DM1** (34 kDa): highest solubility without chaperones, then GroEL, then DnaK; highly soluble. **DM2** (36 kDa): only insoluble, even with chaperones. **DM3** (33 kDa): DnaK highest solubility, then base, then GroEL; very soluble. **DM4** (34 kDa): DnaK highest solubility, then GroEL, then base; very insoluble. **DM6** (39 kDa): GroEL only one with soluble fraction, runs a bit high. **DM7** (36 kDa): DnaK highest solubility, then base, then GroEL very soluble. **DM8** (37 kDa): all similar, different expression levels, first base, then GroEL, then DnaK; more insoluble. **Atlas** (20 kDa): GroEL highest solubility, nothing in base and DnaK.



137 **Comparison of different chaperone conditions for *D. melanogaster* proteins**

138 Western blots were used for comparison of the soluble expression levels with and without  
 139 chaperones, in order to test our hypothesis that chaperones would increase soluble expres-  
 140 sion of the target proteins. The optimal conditions identified by SDS-PAGEs were repeated  
 141 under three settings: i) without chaperones (base), ii) with GroEL and iii) with DnaK. Sur-  
 142 prisingly, we did not observe increased solubility for most putative *de novo* proteins when  
 143 adding chaperones (see **Figure 5** and **Table 1**).

144 **Table 1:** Expression conditions & results of *D. melanogaster de novo* proteins. Base = no  
 chaperones, GroEL = GroEL/ES, DnaK = DnaK/J/GrpE. \*Molecular weight (MW) without  
 tag. Plus signs mean visible expression, two plus signs strong expression, minus sign  
 means no visible expression.

| Protein     | MW (kDa) | Cell/tag   | Base | GroEL | DnaK | Disorder (%) |
|-------------|----------|------------|------|-------|------|--------------|
| <i>DM1</i>  | 34       | T7/GST     | ++   | ++    | +    | 15           |
| <i>DM2</i>  | 36       | Star/GST   | ++   | ++    | -    | 13           |
| <i>DM3</i>  | 33       | T7/GST     | ++   | +     | ++   | 97           |
| <i>DM4</i>  | 34       | T7/GST     | ++   | +     | +    | 21           |
| <i>DM5</i>  | 39       | T7/GST     | -    | +     | -    | 3            |
| <i>DM6</i>  | 12*      | -/-        | -    | -     | -    | 97           |
| <i>DM7</i>  | 36       | T7/GST     | ++   | +     | ++   | 35           |
| <i>DM8</i>  | 37       | T7/GST     | +    | +     | +    | 100          |
| <i>DM9</i>  | 39*      | -/-        | -    | -     | -    | 49           |
| <i>DM10</i> | 15*      | -/-        | -    | -     | -    | 15           |
| Atlas       | 20       | Star/6xHis | -    | ++    | -    | 56           |

147 In contrast, we observed soluble expression for most proteins without chaperones, e.g.  
 148 *DM1*, *DM2*, *DM3*, *DM4* and *DM7*. In combination with GroEL, the intensity of the bands  
 149 in the soluble fraction, and therefore amount of soluble protein, even decreased for *DM3*,  
 150 *DM4* and *DM7*. For *DM2* and *DM5* the amount of soluble protein increased when co-  
 151 expressed with GroEL. When DnaK was co-expressed, protein solubility either appeared to  
 152 decrease (*DM1*, *DM2* and *DM4*), or was similar to the base (*DM3* and *DM7*). *DM8* showed  
 153 similar soluble expression for all three conditions with most of the protein being insoluble. In  
 154 the case of Atlas and *DM5*, soluble protein expression was increased or enabled with the  
 155 addition of the GroEL chaperone system while DnaK and base expression resulted in no

156 or very little soluble protein. While we cannot confirm that co-expression with DnaK in fact  
157 decreases the amount of soluble protein (*DM1*, *DM2* and *DM4*), we do not see increased  
158 soluble expression for any of the candidate proteins in the presence of DnaK as we do for  
159 GroEL (*DM5* and Atlas).

### 160 **Candidates of *Homo sapiens***

161 The 10 putative human *de novo* proteins were expressed following the same protocol  
162 as the *D. melanogaster* proteins by combining the different *E. coli* expression cells, tags  
163 and chaperone systems (**Figure S4**). We detected a similar trend here as for the *D.*  
164 *melanogaster* proteins (N-terminal GST-tag in *E. coli* T7 express cells; see **Table 2**). One  
165 protein (*HS8*), however, was only weakly expressed with an N-terminal 6xHis-tag but using  
166 also *E. coli* T7 express cells. Without the addition of chaperones only *HS7*, *HS8* and  
167 *HS10* were successfully expressed and soluble. After co-expression with chaperones, as  
168 described for *D. melanogaster* proteins, two more *H. sapiens* proteins could be expressed.  
169 Unfortunately, *H. sapiens* protein candidates *HS1*, *HS3*, *HS4*, *HS5* and *HS6* showed no  
170 expression at all, even with chaperones. In total we were able to express 5 out of 10 putative  
171 *de novo* proteins following our protocol (see **Table 2**).

172



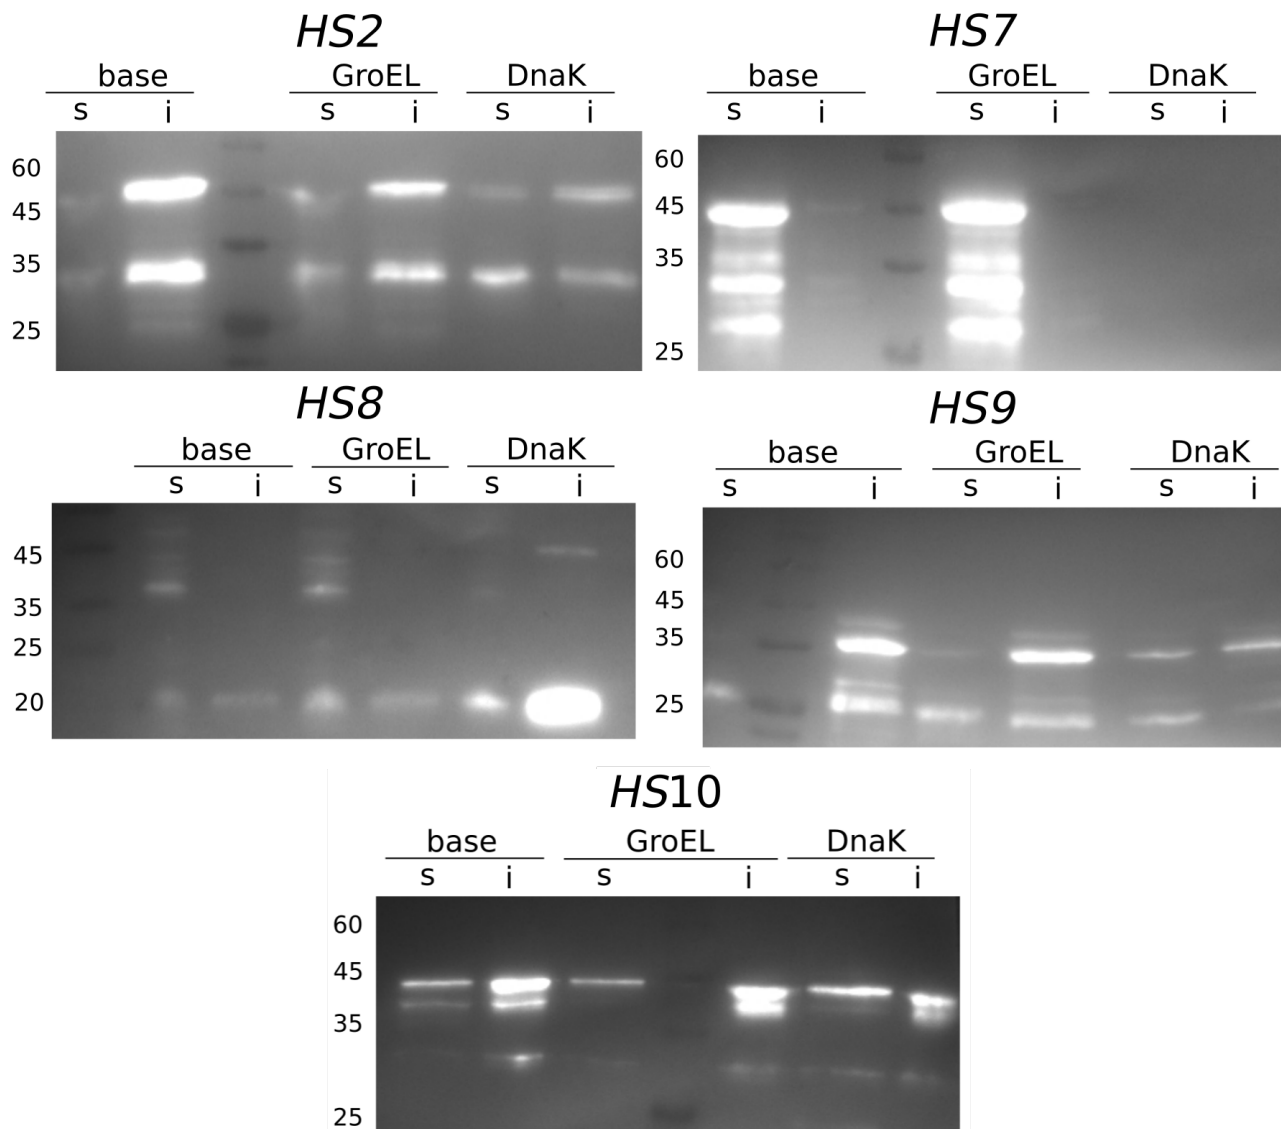

**Figure 6:** Western blots with Anti-His antibody: **HS2** (44 kDa): upper bands (lower are degraded protein or double bands) most in DnaK, then GroEL, then base; very insoluble. **HS7** (50 kDa): GroEL best, then base, nothing in DnaK. Possible protein degradation; very soluble. **HS8** (16 kDa): upper bands most in DnaK, then GroEL, then base; very insoluble. **HS9** (42 kDa): upper bands (lower are degraded protein or double bands) most in DnaK, then GroEL, then base; very insoluble. **HS10** (43 kDa): upper bands (lower are degraded protein or double bands) most in GroEL, then DnaK, then base; very insoluble.

### 173 **Comparison of different chaperone conditions for *H. sapiens* proteins**

174 Western blots were used for comparison of the three different chaperone expressions i)  
 175 base, ii) GroEL and iii) DnaK, as described above. Two out of the five successful candidates  
 176 (**HS2** and **HS9**) showed very weak or no soluble expression without chaperones, but solu-  
 177 bility could be increased with both chaperone systems. **HS8** and **HS10** showed low soluble  
 178 expression overall, but no change in solubility was visible when co-expressing with either

179 chaperone system. The candidate *de novo* protein *HS7* already showed strong soluble  
 180 expression at base (**Figure 6**). However, the addition of GroEL seemed to increase solu-  
 181 ble expression further, while DnaK co-expression led to low or no protein being detected.  
 182 Overall, the trend observed for the *D. melanogaster* proteins was consistent with the trend  
 183 observed for the *H. sapiens* proteins. GroEL increased soluble expression for most putative  
 184 *de novo* proteins while DnaK lacked substantial influence on protein solubility.

**Table 2:** Expression conditions & results of *H. sapiens de novo* proteins. Base = no  
 chaperones, GroEL = GroEL/ES, DnaK = DnaK/J/GrpE. \*Molecular weight (MW) without  
 tag. Plus signs mean visible expression, two plus signs strong expression, minus sign  
 185 means no visible expression.

| Protein         | MW (kDa) | Cell/tag | Base | GroEL | DnaK | Disorder (%) |
|-----------------|----------|----------|------|-------|------|--------------|
| <i>HS1</i>      | 17*      | -/-      | -    | -     | -    | 59           |
| <i>HS2</i>      | 44       | T7/GST   | -    | +     | +    | 84           |
| <i>HS3</i>      | 20*      | -/-      | -    | -     | -    | 60           |
| <i>HS4</i>      | 16*      | -/-      | -    | -     | -    | 54           |
| 186 <i>HS5</i>  | 15*      | -/-      | -    | -     | -    | 51           |
| <i>HS6</i>      | 22*      | -/-      | -    | -     | -    | 51           |
| <i>HS7</i>      | 50       | T7/GST   | + +  | + +   | -    | 82           |
| <i>HS8</i>      | 16       | T7/6xHis | +    | +     | +    | 60           |
| <i>HS9</i>      | 42       | T7/GST   | -    | +     | +    | 56           |
| 187 <i>HS10</i> | 43       | T7/GST   | +    | +     | +    | 99           |

## 188 Discussion

189 *De novo* proteins have first been detected more than a decade ago and the mechanism of  
190 their emergence has been studied intensely ever since [[Begun et al., 2006](#), [Van Oss and](#)  
191 [Carvunis, 2019](#)]. Still, there are concerns (i) regarding the reliability of their computational  
192 identification [[Moyers and Zhang, 2015](#), [Domazet-Lošo et al., 2017](#), [Weisman et al., 2022](#)]  
193 and (ii) if and how they code for functional proteins. To shed light on these concerns, *de novo*  
194 proteins need to be studied experimentally as well as theoretically. The handling of *de novo*  
195 proteins by heterologous expression and purification is often difficult because solubility is low  
196 and purification yields little amounts and potentially unstable proteins. Moreover, identifying  
197 the function of these young genes, is another challenging task. In this study we present a  
198 guideline for expressing *de novo* proteins in *E. coli*.

## 199 Expression cells

200 *E. coli* is the most widely used model organism for recombinant expression. However, for-  
201 eign proteins can be toxic to *E. coli* by interfering with the physiology or leading to protein  
202 aggregation. This may result in low expression yields, growth defects or even cell death  
203 ([Saïda et al. \[2006\]](#), [Saïda \[2007\]](#), [Rosano and Ceccarelli \[2014\]](#)). Optimized expression  
204 hosts and plasmids ([Saïda et al. \[2006\]](#), [Saïda \[2007\]](#), [Rosano and Ceccarelli \[2014\]](#)) or  
205 chaperones can be used to overcome the expression issues caused by proteins which are  
206 a metabolic burden for the host. Here, we used two different types of the *E. coli* strains  
207 (DE3): BL21 Star<sup>TM</sup> and T7 Express. Both strains resulted in effective protein expression  
208 and a relatively high yield of the *de novo* proteins, with T7 Express being the best option.  
209 The *de novo* proteins studied here are possibly a toxic, metabolic burden to the *E. coli* cells,  
210 suggesting T7 cells are the better choice of expression cell. BL21 Star<sup>TM</sup> (DE3) contains a  
211 T7-RNA-polymerase under control of lacUV5 promoter together with higher mRNA stability.  
212 This leads to stable mRNA transcripts and higher amount of target protein. However, BL21  
213 Star<sup>TM</sup> (DE3) cells have increased basal expression of heterologous genes and cannot ex-  
214 press toxic genes. In contrast, the T7 Express cells have a reduced basal expression of  
215 target proteins than BL21 Star<sup>TM</sup> (DE3) cells. Therefore, toxic proteins can be expressed  
216 better in T7 cells compared to BL21 Star<sup>TM</sup> [[New England Biolabs](#)].

## 217 **Comparing different protein tags**

218 Based on our study, an N-terminal GST-tag was the more appropriate choice than a 6x His-  
219 tag. Some *de novo* protein candidates are quite small (8-12 kDa), so a larger tag like GST  
220 might already stabilise in a chaperone-like manner [[Harper and Speicher, 2011](#), [Rosano and](#)  
221 [Ceccarelli, 2014](#)]. However, Atlas and *HS8*, i.e. two out of 21, were only expressed with an  
222 N-terminal 6x His-tag. With a mass of only 1 kDa, 6x His-tag is the better choice for further  
223 structural characterisation using circular dichroism (CD), multi-angle light scattering (MALS)  
224 or nuclear magnetic resonance (NMR), since a small tag has less influence on protein fold-  
225 ing. In contrast, the larger GST-tag needs to be cleaved for most follow-up experiments.  
226 When removing the tag, the *de novo* protein might behave differently and could degrade or  
227 aggregate.

## 228 **Influence of chaperones on protein expression and solubility**

229 Our western blot results indicate that GroEL slightly outperforms DnaK in terms of increased  
230 protein solubility. In some cases both chaperone systems increase or enable soluble expres-  
231 sion (*HS2* and *HS9*, 2/21) but for most proteins GroEL leads to more soluble protein than  
232 DnaK (*DM1*, *DM2*, *DM5*, Atlas and *HS7*, 5/21). DnaK requires easily accessible hydropho-  
233 bic fragments that can be predicted from the protein sequence, while GroEL demands no  
234 defined binding motifs. However, in the case of our proteins we found no connection between  
235 predicted DnaK binding sites and influence of DnaK on protein expression level (**Figure S2**).  
236 Contrary to our findings here, we did not observe that GroEL increases protein solubility in  
237 [Heames et al. \[2022\]](#), where we used a library of 1800 putative *de novo* proteins (4 - 8 kDa)  
238 in a cell-free expression system.

239 We cannot verify that changes with co-expression of chaperones is solely due to effects of  
240 chaperones on putative *de novo* proteins or on overall amount of protein expression. Our  
241 main interest here is to optimise expression for follow-up experiments and not to draw gen-  
242 eral conclusions on chaperone interaction with *de novo* proteins. Drawing conclusions from  
243 heterologous expression experiments towards *in vivo* interactions of proteins and chaper-  
244 one systems is fragmentary and can only serve as hypotheses in need of further verification  
245 using *in vivo* experiments [[Niwa et al., 2012](#)].

## 246 **Comparing putative *de novo* proteins from *D. melanogaster* to *H. sapiens***

247 In total we were able to successfully express 13 out of 21 putative *de novo* proteins in *E.*  
248 *coli* cells (eight in *D. melanogaster* and five in *H. sapiens*), resulting in a success rate of  
249 62 %. For both, *D. melanogaster* and *H. sapiens* candidate putative *de novo* proteins, the  
250 combination of GST-tag and *E. coli* T7 Express cells were the best performing (10 out of  
251 13; 77 %). We performed test expressions and compared the levels of soluble expression  
252 for different chaperone combinations shown in **Figures 5** and **6**. Expression results from  
253 putative *de novo* protein candidates *DM5*, Atlas, *HS2* and *HS9* were in line with our  
254 original hypothesis that chaperones enhance solubility of *de novo* proteins in heterologous  
255 expression systems. However, the choice of appropriate tag and expression cells in the first  
256 step was equally, if not more, important. When using the N-terminal His-tag that proved  
257 successful for putative *de novo* protein Gdrd, only two (Atlas and *HS7*) of our candidate  
258 proteins were expressed. When switching to the N-terminal GST-tag another seven *D.*  
259 *melanogaster* and four more *H. sapiens* protein candidates were expressed. Unfortunately,  
260 we were not able to express 38 % of the candidate proteins in *E. coli* at all (*HS1*, *HS3* - *HS6*,  
261 *DM6*, *DM9* and *DM10*), despite trying different expression strains, tags and chaperone  
262 systems.

263

## 264 **Disorder & secondary structure predictions**

265 When examining the predicted structural properties of the human *de novo* protein candi-  
266 dates, we observe a slight trend towards better expression of the more disordered proteins.  
267 This trend can be observed for the IUPred2a disorder predictions (**Figure 3**) but becomes  
268 more apparent for the overall secondary structure predictions (**Figure 4**). The unsuccessful  
269 expression candidates *HS1*, *HS3* and *HS4* showed a higher predicted  $\alpha$ -helical content of  
270 approximately 40 % while *HS5* and *HS6* had a higher predicted  $\beta$ -sheet content of around  
271 30 - 40 % compared to the other human candidate proteins. The described differences in  
272 predicted secondary structure content and disorder level might be the reason why these  
273 putative *de novo* candidates could not be expressed in *E. coli* cells even with the help of  
274 chaperones.

275 For *D. melanogaster* protein candidates, this trend was not observed. Here, several of the  
276 proteins with lower disorder predicted (*DM1*, *DM4* and *DM7*) were expressed solubly without

277 addition of chaperones. Yet, *DM6* ( $\sim 90$  % disorder predicted) was not expressed success-  
278 fully. However, the two proteins with 100 % random coils predicted by Porter 5.0 and highest  
279 disorder predictions by IUPred2a (*DM8* and *HS10*) did not show any change in solubility  
280 when chaperones were co-expressed. Considering that such highly disordered proteins do  
281 not need chaperones, this observation was expected.

282 Deviations of the level of predicted disorder and predicted secondary structures, especially  
283 random coils, for each protein can be explained by the differences of IUPred2a and Porter  
284 5.0. IUPred2a provides energy estimations for each amino acid residue resulting in quasi-  
285 probabilities of disorder [Mészáros et al., 2018]. On the other hand, Porter 5.0 is based on  
286 a neural network relying on sequence alignments and co-evolutionary information [Torrissi  
287 et al., 2018]. These fundamentally different approaches can lead to inconsistent results in  
288 some cases (e.g. *HS9*, *DM3*) while not invalidating one another.

## 289 Conclusion and Outlook

290 Exemplifying the general trend for soluble *de novo* protein expression is only the first step  
291 towards enabling further *in vitro* experiments for functional and structural characterisation.  
292 Further advancement will lead to efficient and stable purification, followed by functional as-  
293 says such as peptide phage display to identify binding partners [Sundell and Ivarsson, 2014,  
294 Ivarsson et al., 2014]. This technique has proven to be useful for high-throughput screen-  
295 ing of intrinsically disordered regions for short linear motifs [Ali et al., 2020], especially for  
296 human proteins. Soluble expression and purification will be crucial for structural charac-  
297 terisation via CD, NMR and Cryo-EM. Due to their small size and high disorder content,  
298 only NMR [Lange et al., 2021] and potentially Cryo-EM [Chiu et al., 2021] will be capable  
299 of solving the structure of *de novo* proteins experimentally. Even in light of the recent dawn  
300 of computational structure prediction [Jumper et al., 2021, Baek et al., 2021], experimental  
301 structural and functional determination remains necessary, especially for *de novo* proteins.  
302 While contemporary prediction methods can certainly provide a first estimate on structure,  
303 the intrinsic nature of *de novo* proteins, with their short length, high disorder content and  
304 lack of homology, will demand some scepticism while analysing such predictions [Ruff and  
305 Pappu, 2021, Monzon et al., 2022].  
306 This study of 21 putative *de novo* proteins from *H. sapiens* and *D. melanogaster*, including

307 previously *in vivo* characterised putative *de novo* protein Atlas, showed that chaperones may  
308 help expressing *de novo* proteins in *E. coli* cells. However, not all putative *de novo* proteins  
309 needed chaperones for soluble expression and sometimes even expressed better without.  
310 Fusion of the target *de novo* proteins to a GST-tag and using T7 Express cells as hosts  
311 proved to be the most successful combination. Our work may serve as a guide to facilitating  
312 future analyses of putative *de novo* proteins or other difficult (short and/or disordered) target  
313 proteins in *E. coli*.

## 314 **Material and Methods**

### 315 **Online data availability**

316 All SDS-PAGEs, MS results, western blots and scripts are deposited in Zenodo database  
317 (<https://doi.org/10.5281/zenodo.6283284>)

### 318 **Computational Methods**

#### 319 **Candidate selection**

320 We selected a total of 21 putative *de novo* protein candidates. Ten are uncharacterised  
321 putative *de novo* proteins from *Homo sapiens* [Dowling et al., 2020] and are referred to here  
322 as HS1-10. Ten proteins originate from *Drosophila melanogaster* [Heames et al., 2020]  
323 and are referred to as DM1-10. One is the functionally characterised putative *de novo*  
324 protein Atlas from *D. melanogaster* [Rivard et al., 2021]. The 21 candidates contain different  
325 levels of disorder and secondary structure elements ( $\alpha$ -helix,  $\beta$ -sheet, mixture of both) and  
326 different sequence lengths (see **Figure 3**). We selected only candidate sequences without  
327 exon/intron structure and without long single amino acid repeats. All putative *de novo*  
328 proteins have confirmed expression in their native organism.

329

#### 330 **Predictions**

331 We performed disorder predictions with IUPred2a [Erdős and Dosztányi, 2020, Mészáros  
332 et al., 2018] using default options *long disorder* for entire proteins. We calculated the av-  
333 erage disorder score of the whole sequence and percentage of residues predicted to be



334 disordered. The percentage of disorder was calculated by taking the amount of disordered  
335 residues (disorder score > 0.5) and dividing it by the sequence length of the protein. We also  
336 predicted average disorder and percentage of disordered residues with a disorder threshold  
337 of 0.8 (**Figure S1**). A python script was used to automate predictions and disorder propor-  
338 tion for all candidates. We performed  $\alpha$ -helix and  $\beta$ -sheet predictions to verify the amount  
339 of disordered residues predicted by IUPred2a. Secondary structure predictions were per-  
340 formed with Porter 5.0 (SS3) [Torrissi et al., 2018, 2019]. The predicted secondary structure  
341 elements for each residue were counted with a Javascript and divided by the total number  
342 of residues to obtain a percentage score for each structural element. DnaK binding sites  
343 were predicted using the ChaperISM suite (v1) in quantitative mode with default settings  
344 [Gutierrez et al., 2020].

## 345 **Experimental Methods**

### 346 **Cloning of putative *de novo* candidates**

347 Putative *de novo* candidates were synthesised as strings DNA from Twist Bioscience,  
348 San Francisco, codon optimized for *E.coli* and without restriction sites used for cloning  
349 (BamH1, HindIII, NcoI, XhoI) inside the sequence. The wild-type DNA for Atlas was  
350 provided by Geoff Findlay. To introduce restriction sites at the ends we used different  
351 primers (a fasta file containing the DNA sequences and primer used can be found online  
352 on Zenodo (<https://doi.org/10.5281/zenodo.6283284>)). For cloning into pHAT2 vector  
353 (N-terminal 6xHis) we used restriction enzymes combination of BamHI/XhoI + HindIII, for  
354 pETM-30 (N-terminal 6xHis-GST-TEV) we used NcoI+HindIII. Both vectors were from the  
355 EMBL vector database, Heidelberg, introduced stop-codon was TAA for all constructs. We  
356 digested the PCR product with both restriction enzymes respectively (FastDigest, Thermo  
357 Scientific) for 3 h at 37 C. Digest of the vector (1 h, 37 C) was purified from agarose gel  
358 (Zymo Research). We ligated both with an insert:vector ratio of 1:4 using Ligase (Thermo  
359 Scientific; 1 h, 22 C). The ligation mix was purified (Zymo Research) and 2  $\mu$ L of the purified  
360 reaction mix was used to transform into 50  $\mu$ L of chemically competent *E. coli* TOP10  
361 cells. Cells were incubated for 30 min on ice, followed by a 90 sec heat-shock at 42 C.  
362 500  $\mu$ L of LB-Media (5 g yeast extract, 6 g tryptone, 5 g NaCl) was added for recovery  
363 and incubated for 1 h at 37 C. After incubation the resuspended cell pellets were plated on



364 LB-agar containing 50 µg/mL ampicillin (AMP, Carl Roth, pHAT2, EMBL vector database) or  
365 Kanamycin (KAN, Carl Roth, pETM-30, EMBL vector database) and incubated at 37 C over  
366 night.

367 Successful transformation was verified by colony PCR and sequencing at Microsynth,  
368 Seqlab, Germany. The plasmid DNA bearing the chaperone combination GroEL/ES (pGro7)  
369 or DnaK/J/GrpE (pKJE) from Takara Biotech chaperone kit [Nishihara et al., 1998, 2000]  
370 were first transformed into *E coli* Top10 cells and then into expression strains (BL21 Star<sup>TM</sup>  
371 (DE3) and T7 Express). Chaperone plasmid bearing cells were made chemically competent  
372 (Inoue-method) [Inoue et al., 1990, Sambrook and Russell, 2006] and used for transfor-  
373 mation with the plasmid containing the target protein sequence. Final expression cells  
374 contained two plasmids: chaperone plasmid and target protein plasmid. The chaperone  
375 plasmids are chloramphenicol (CAM) resistant, so the double plasmid cells are either  
376 AMP+CAM (pHAT2, N-terminal 6xHistag) or KAN+CAM (pETM-30, N-terminal GST-tag)  
377 resistant.

378

### 379 **Test-Expression of candidate *de novo* proteins**

380 To identify in which strain and plasmid proteins were expressed we performed test expres-  
381 sions. 10 mL of LB+AMP+CAM or LB+KAN+CAM were inoculated from a glycerol stock of  
382 all three expression cells bearing both plasmids (target protein and chaperone) and grown  
383 until turbid (6-8 h, 37). We split the solutions into 3x3 mL and incubated for 30 min at  
384 different temperatures (37 C, 28 C, and 20 C) before adding IPTG (Carl Roth) for a final  
385 concentration of 0.5 mM and shaking over night. When using the cells with chaperone  
386 plasmids we made the following adjustment: L-arabinose (final concentration 3 mM, Carl  
387 Roth) was added from the beginning for immediate induction of chaperone expression.  
388 Therefore, after inducing the *de novo* protein expression with IPTG the chaperones were  
389 already present in order to help folding the *de novo* proteins.

390 500 of each cell culture were centrifuged (15000 rpm, 2min). Pellets were re-suspended and  
391 lysed in 50 of a mix of Bugbuster and Lysonase (both Merck AG) through vortexing for 10  
392 min. After centrifugation the supernatant was mixed with the same volume of SDS-loading  
393 buffer (standard). The pellet was resuspended in 5x diluted Bugbuster, centrifuged and  
394 resuspended in 50 SDS-loading buffer. 15 of each fraction was loaded on an SDS-PAGE,

395 either 10 % Bis-Tris or 12.5% TGS, run on 200V for 50min and dyed using ReadyBlue™  
396 staining.

397 For the final western blots the determined optimal combination of strain, expression vector  
398 and chaperone plasmid was used. 20 mL cultures of 2YT+AMP+CAM or 2YT+KAN+CAM  
399 were inoculated with 1mL of the overnight culture. L-arabinose (final concentration 3 mM)  
400 was added to the samples, but not to the control without chaperones and grown at 37C,  
401 180 rpm for 4-6 hours until turbid. The cultures were incubated at 28 C, 180 rpm for  
402 30 min before induction with IPTG (final concentration 0.5 mM) and incubated overnight  
403 under these conditions. Final samples were harvested and handled as prior performed  
404 test-expressions.

405

#### 406 **Western blot**

407 The SDS-PAGEs were run as described above but without ReadyBlue™staining. The gel  
408 was equilibrated in transfer buffer (20 % Methanol) for a few seconds. A polyvinylidene  
409 fluoride (PVDF) membrane with a pore size of 0.22 m was activated by methanol (2 min) and  
410 equilibrated in transfer buffer. The semi-dry transfer was performed at 25V for 30 minutes  
411 using the BioRad standard protocol. The membrane was blocked at room temperature for 1  
412 hour using 5 % bovine serum albumin BSA in phosphate-buffered saline with tween (PBS-T)  
413 then washed in PBS-T and incubated for 1 hour with anti-His antibody (MA1-21315-HRP)  
414 diluted 1:500. For chemiluminescence 0.5 mL luminol was mixed with 0.5 mL peroxide and  
415 distributed evenly on the membrane.

416

#### 417 **Mass spectrometry**

418 Tryptic digest followed by mass spectrometry for peptide detection of the candidate proteins  
419 was performed by the Core Unit Proteomics group of Prof. Dr. Simone König, UKM  
420 Muenster.

421

## 422 **Acknowledgements**

423 A.L., E.BB and M.A. were funded by the Volkswagen Stiftung (VWF), grant code 98183.  
424 K.B. was funded by the Deutsche Forschungsgemeinschaft (DFG, German Research  
425 Foundation) — 281125614/GRK2220. We thank Prof. Geoff Findlay (College of the Holy  
426 Cross, Boston, Massachusetts) for the Atlas WT-sequence, Anne Diehl (FMP Berlin) for  
427 the BL21 Star<sup>TM</sup> (DE3) and T7 Express cells, our Master students Kai Köstler and Roman  
428 Schauerte for their help in the lab, and Prof. Simone König from the Core Unit Proteomic  
429 facility for performing the tryptic digest and mass spectrometry. We thank Mark Harrison for  
430 comments on the manuscript.

431

## 432 **Author Contributions**

433 A.L. + E.BB. designed research; M.A., L.A.E. , and A.L. performed cloning and expression;  
434 M.A. and L.A.E. performed western blots. M.A., K.B. and L.A.E. performed predictions. All  
435 authors wrote and approved the final version of the manuscript.

436

## 437 **Declaration of Interests**

438 The authors declare no competing interests.

## 439 **References**

- 440 Diethard Tautz and Tomislav Domazet-Lošo. The Evolutionary Origin of Orphan Genes.  
441 *Nature Reviews Genetics*, 12(10):692–702, October 2011. ISSN 1471-0056. doi: 10.  
442 1038/nrg3053.
- 443 Aoife McLysaght and Laurence D. Hurst. Open Questions in the Study of de Novo Genes:  
444 What, How and Why. *Nature Reviews Genetics*, 17(9):567–578, September 2016. ISSN  
445 1471-0064. doi: 10.1038/nrg.2016.78.
- 446 Jonathan F Schmitz and Erich Bornberg-Bauer. Fact or Fiction: Updates on How Protein-  
447 Coding Genes Might Emerge de Novo from Previously Non-Coding DNA. *F1000Research*,  
448 6:57, January 2017. ISSN 2046-1402. doi: 10.12688/f1000research.10079.1.
- 449 Stephen Branden Van Van Oss and Anne-Ruxandra Carvunis. De Novo Gene Birth. *PLOS*  
450 *Genetics*, 15(5):e1008160, May 2019. ISSN 1553-7404. doi: 10.1371/journal.pgen.  
451 1008160.
- 452 Christian Rödelsperger, Neel Prabh, and Ralf J. Sommer. New Gene Origin and Deep Taxon  
453 Phylogenomics: Opportunities and Challenges. *Trends in genetics: TIG*, 35(12):914–922,  
454 December 2019. ISSN 0168-9525. doi: 10.1016/j.tig.2019.08.007.
- 455 Erich Bornberg-Bauer, Klara Hlouchova, and Andreas Lange. Structure and function of  
456 naturally evolved de novo proteins. *Current Opinion in Structural Biology*, 68:175–183,  
457 June 2021. ISSN 1879-033X. doi: 10.1016/j.sbi.2020.11.010.
- 458 Brennen Heames, Filip Buchel, Margaux Aubel, Vyacheslav Tretyachenko, Andreas Lange,  
459 Erich Bornberg-Bauer, and Klara Hlouchova. Experimental characterisation of de novo  
460 proteins and their unevolved random-sequence counterparts. *bioRxiv*, 2022. doi: 10.  
461 1101/2022.01.14.476368.
- 462 David A. Liberles, Grigory Kolesov, and Katharina Dittmar. Understanding Gene Dupli-  
463 cation Through Biochemistry and Population Genetics. In *Evolution after Gene Dupli-*  
464 *cation*, pages 1–21. John Wiley & Sons, Ltd, 2011. ISBN 978-0-470-61990-2. doi:  
465 10.1002/9780470619902.ch1.

- 466 Susumu Ohno. *Evolution by Gene Duplication*. Springer-Verlag, 1970. ISBN  
467 9780387052250. doi: 10.1002/tera.1420090224.
- 468 Erich Bornberg-Bauer and M. Mar Albà. Dynamics and Adaptive Benefits of Modular Protein  
469 Evolution. *Current Opinion in Structural Biology*, 23(3):459–466, June 2013. ISSN 1879-  
470 033X. doi: 10.1016/j.sbi.2013.02.012.
- 471 Nikolaos Vakirlis, Anne-Ruxandra Carvunis, and Aoife McLysaght. Synteny-based analyses  
472 indicate that sequence divergence is not the main source of orphan genes. *eLife*, 9:  
473 e53500, feb 2020. ISSN 2050-084X. doi: 10.7554/eLife.53500.
- 474 David J. Begun, Heather A. Lindfors, Melissa E. Thompson, and Alisha K. Holloway. Re-  
475 cently Evolved Genes Identified From *Drosophila yakuba* and *D. erecta* Accessory Gland  
476 Expressed Sequence Tags. *Genetics*, 172(3):1675–1681, March 2006. ISSN 0016-6731,  
477 1943-2631. doi: 10.1534/genetics.105.050336.
- 478 Jing Cai, Ruoping Zhao, Huifeng Jiang, and Wen Wang. De Novo Origination of a New  
479 Protein-Coding Gene in *Saccharomyces cerevisiae*. *Genetics*, 179(1):487–496, May  
480 2008. ISSN 0016-6731, 1943-2631. doi: 10.1534/genetics.107.084491.
- 481 Rafik Neme and Diethard Tautz. Phylogenetic Patterns of Emergence of New Genes Support  
482 a Model of Frequent de Novo Evolution. *BMC Genomics*, 14(1):117, February 2013. ISSN  
483 1471-2164. doi: 10.1186/1471-2164-14-117.
- 484 Aoife McLysaght and Daniele Guerzoni. New Genes from Non-Coding Sequence: The Role  
485 of de Novo Protein-Coding Genes in Eukaryotic Evolutionary Innovation. *Philosophical  
486 Transactions of the Royal Society B: Biological Sciences*, 370(1678):20140332, Septem-  
487 ber 2015. ISSN 0962-8436, 1471-2970. doi: 10.1098/rstb.2014.0332.
- 488 Christian Schlötterer. Genes from Scratch – the Evolutionary Fate of de Novo Genes. *Trends  
489 in Genetics*, 31(4):215–219, April 2015. ISSN 0168-9525. doi: 10.1016/j.tig.2015.02.007.
- 490 Jonathan F. Schmitz, Kristian K. Ullrich, and Erich Bornberg-Bauer. Incipient de Novo  
491 Genes Can Evolve from Frozen Accidents That Escaped Rapid Transcript Turnover.  
492 *Nature Ecology & Evolution*, 2(10):1626–1632, October 2018. ISSN 2397-334X. doi:  
493 10.1038/s41559-018-0639-7.

- 494 Nikolaos Vakirlis, Alex S. Hebert, Dana A. Opulente, Guillaume Achaz, Chris Todd Hittinger,  
495 Gilles Fischer, Joshua J. Coon, and Ingrid Lafontaine. A Molecular Portrait of De Novo  
496 Genes in Yeasts. *Molecular Biology and Evolution*, 35(3):631–645, March 2018. ISSN  
497 0737-4038. doi: 10.1093/molbev/msx315.
- 498 Neel Prabh and Christian Rödelsperger. De Novo, Divergence, and Mixed Origin Contribute  
499 to the Emergence of Orphan Genes in *Pristionchus* Nematodes. *G3: Genes, Genomes,*  
500 *Genetics*, page g3.400326.2019, May 2019. ISSN 2160-1836. doi: 10.1534/g3.119.400326.
- 501 Li Zhang, Yan Ren, Tao Yang, Guangwei Li, Jianhai Chen, Andrea R. Gschwend, Yeisoo  
502 Yu, Guixue Hou, Jin Zi, Ruo Zhou, Bo Wen, Jianwei Zhang, Kapeel Chougule, Muhua  
503 Wang, Dario Copetti, Zhiyu Peng, Chengjun Zhang, Yong Zhang, Yidan Ouyang, Rod A.  
504 Wing, Siqi Liu, and Manyuan Long. Rapid Evolution of Protein Diversity by de Novo  
505 Origination in *Oryza*. *Nature Ecology & Evolution*, 3(4):679, April 2019. ISSN 2397-334X.  
506 doi: 10.1038/s41559-019-0822-5.
- 507 Brennen Heames, Jonathan Schmitz, and Erich Bornberg-Bauer. A Continuum of Evolv-  
508 ing de Novo Genes Drives Protein-Coding Novelty in *Drosophila*. *Journal of Molecular*  
509 *Evolution*, 2020. doi: 10.1007/s00239-020-09939-z.
- 510 Daniel Dowling, Jonathan F. Schmitz, and Erich Bornberg-Bauer. Stochastic gain and loss  
511 of novel transcribed open reading frames in the human lineage. *Genome Biology and*  
512 *Evolution*, 12:2183 – 2195, 2020. doi: 10.1093/gbe/evaa194.
- 513 Anna Grandchamp, Katrin Berk, Elias Dohmen, and Erich Bornberg-Bauer. New genomic  
514 signals underlying the emergence of human proto-genes. *bioRxiv*, 2022. doi: 10.1101/  
515 2022.01.04.474757.
- 516 Tomislav Domazet-Lošo, Anne-Ruxandra Carvunis, M. Mar Albà, Martin Sebastijan Šestak,  
517 Robert Bakarić, Rafik Neme, and Diethard Tautz. No Evidence for Phylostratigraphic Bias  
518 Impacting Inferences on Patterns of Gene Emergence and Evolution. *Molecular Biology*  
519 *and Evolution*, 34(4):843–856, April 2017. ISSN 0737-4038. doi: 10.1093/molbev/msw284.
- 520 Andreas Lange, Prajal H. Patel, Brennen Heames, Adam M. Damry, Thorsten Saenger,  
521 Colin J. Jackson, Geoffrey D. Findlay, and Erich Bornberg-Bauer. Structural and functional  
522 characterization of a putative de novo gene in *Drosophila*. *Nature Communications*, 12(1):  
523 1667, March 2021. ISSN 2041-1723. doi: 10.1038/s41467-021-21667-6.

- 524 Dixie Bungard, Jacob S. Copple, Jing Yan, Jimmy J. Chhun, Vlad K. Kumirov, Scott G. Foy,  
525 Joanna Masel, Vicki H. Wysocki, and Matthew H. J. Cordes. Foldability of a Natural De  
526 Novo Evolved Protein. *Structure*, 25(11):1687–1696.e4, November 2017. ISSN 0969-  
527 2126. doi: 10.1016/j.str.2017.09.006.
- 528 Nobuhiko Tokuriki and Dan S. Tawfik. Chaperonin overexpression promotes genetic variation  
529 and enzyme evolution. *Nature*, 459:668–673, 2009a. doi: 10.1038/nature08009.
- 530 Nobuhiko Tokuriki and Dan S. Tawfik. Protein dynamism and evolvability. *Science*, 324:203  
531 – 207, 2009b. doi: 10.1126/science.1169375.
- 532 Nobuhiko Tokuriki and Dan S. Tawfik. Stability effects of mutations and protein evolvability.  
533 *Current opinion in structural biology*, 19 5:596–604, 2009c. doi: 10.1016/j.sbi.2009.08.003.
- 534 Colin Jackson, Agnes Toth-Petroczy, Rachel Kolodny, Florian Hollfelder, Monika Fuxreiter,  
535 Shina Caroline Lynn Kamerlin, and Nobuhiko Tokuriki. Adventures on the routes of protein  
536 evolution — in memoriam dan salah tawfik (1955 - 2021). *Journal of Molecular Biology*,  
537 page 167462, 2022. ISSN 0022-2836. doi: 10.1016/j.jmb.2022.167462.
- 538 Misha Soskine and Dan S. Tawfik. Mutational effects and the evolution of new protein func-  
539 tions. *Nature Reviews Genetics*, 11:572–582, 2010. doi: 10.1038/nrg2808.
- 540 Vyacheslav Tretyachenko, Jiří Vymětal, Lucie Bednárová, Vladimír Kopecký, Kateřina Hof-  
541 bauerová, Helena Jindrová, Martin Hubálek, Radko Souček, Jan Konvalinka, Jiří Von-  
542 drášek, and Klára Hlouchová. Random Protein Sequences Can Form Defined Secondary  
543 Structures and Are Well-Tolerated in Vivo. *Scientific Reports*, 7(1):15449, November 2017.  
544 ISSN 2045-2322. doi: 10.1038/s41598-017-15635-8.
- 545 Brigitte Gasser, Markku Saloheimo, Ursula Rinas, Martin Dragosits, Escarlata Rodríguez-  
546 Carmona, Kristin Baumann, Maria Giuliani, Ermenegilda Parrilli, Paola Branduardi, Chris-  
547 tine Lang, Danilo Porro, Pau Ferrer, Maria Luisa Tutino, Diethard Mattanovich, and Antonio  
548 Villaverde. Protein folding and conformational stress in microbial cells producing recom-  
549 binant proteins: a host comparative overview. *Microbial Cell Factories*, 7:11 – 11, 2008.  
550 doi: 10.1186/1475-2859-7-11.
- 551 Erich Bornberg-Bauer, Jonathan F. Schmitz, and Magdalena Heberlein. Emergence of de



- 552 novo proteins from 'dark genomic matter' by 'grow slow and moult'. *Biochemical Society*  
553 *transactions*, 43 5:867–73, 2015. doi: 10.1042/BST20150089.
- 554 Andrija Finka, Rayees U. H. Mattoo, and Pierre Goloubinoff. Experimental milestones in the  
555 discovery of molecular chaperones as polypeptide unfolding enzymes. *Annual review of*  
556 *biochemistry*, 85:715–42, 2016. doi: 10.1146/annurev-biochem-060815-014124.
- 557 David S. Libich, Vitali Tugarinov, and G. Marius Clore. Intrinsic unfoldase/foldase activity  
558 of the chaperonin groel directly demonstrated using multinuclear relaxation-based nmr.  
559 *Proceedings of the National Academy of Sciences*, 112:8817 – 8823, 2015. doi: 10.1073/  
560 pnas.1510083112.
- 561 Zong Lin, Damian Madan, and Hays S. Rye. Groel stimulates protein folding through forced  
562 unfolding. *Nature Structural & Molecular Biology*, 15:303–311, 2008. doi: 10.1038/nsmb.  
563 1394.
- 564 Jeffrey G. Thomas, Amanda Ayling, and Francois. Baneyx. Molecular chaperones, folding  
565 catalysts, and the recovery of active recombinant proteins from E. coli. To fold or to refold.  
566 *Appl Biochem Biotechnol*, 66(3):197–238, Jun 1997. doi: 10.1007/BF02785589.
- 567 Hartwig Schröder, Thomas Langer, F. Ulrich Hartl, and Bernd Bukau. Dnak, dnaj and grpe  
568 form a cellular chaperone machinery capable of repairing heat-induced protein damage.  
569 *The EMBO Journal*, 12, 1993. doi: 10.1002/j.1460-2075.1993.tb06097.x.
- 570 Sandeep Savitaprakash Sharma, Paolo De Los Rios, Philipp Christen, Ariel Lustig, and  
571 Pierre Goloubinoff. The kinetic parameters and energy cost of the hsp70 chaperone as  
572 a polypeptide unfoldase. *Nature chemical biology*, 6 12:914–20, 2010. doi: 10.1038/  
573 nchembio.455.
- 574 Yujin E. Kim, Mark S. Hipp, Andreas Bracher, Manajit Hayer-Hartl, and F. Ulrich Hartl. Molec-  
575 ular chaperone functions in protein folding and proteostasis. *Annual review of biochem-*  
576 *istry*, 82:323–55, 2013. doi: 10.1146/annurev-biochem-060208-092442.
- 577 Alireza Mashaghi, Sergey Bezrukavnikov, David P. Minde, Anne S Wentink, Roman Kityk,  
578 Beate Zachmann-Brand, Matthias P. Mayer, Günter Kramer, Bernd Bukau, and Sander J.  
579 Tans. Alternative modes of client binding enable functional plasticity of hsp70. *Nature*,  
580 539:448–451, 2016. doi: 10.1038/nature20137.



- 581 Pierre Goloubinoff, Anthony A. Gatenby, and George H. Lorimer. Groe heat-shock proteins  
582 promote assembly of foreign prokaryotic ribulose biphosphate carboxylase oligomers in  
583 *escherichia coli*. *Nature*, 337:44–47, 1989. doi: 10.1038/337044a0.
- 584 Emily L. Rivard, Andrew G. Ludwig, Prajal H. Patel, Anna Grandchamp, Sarah E. Arnold,  
585 Alina Berger, Emilie M. Scott, Brendan J. Kelly, Grace C. Mascha, Erich Bornberg-Bauer,  
586 and Geoffrey D. Findlay. A putative de novo evolved gene required for spermatid chromatin  
587 condensation in *Drosophila melanogaster*. *PLOS Genetics*, 17(9):e1009787, September  
588 2021. ISSN 1553-7404. doi: 10.1371/journal.pgen.1009787.
- 589 Gábor Erdős and Zsuzsanna Dosztányi. Analyzing Protein Disorder with IUPred2A. *Current*  
590 *Protocols in Bioinformatics*, 70(1):e99, 2020. ISSN 1934-340X. doi: 10.1002/cpbi.99.
- 591 Bálint Mészáros, Gábor Erdős, and Zsuzsanna Dosztányi. IUPred2A: Context-dependent  
592 prediction of protein disorder as a function of redox state and protein binding. *Nucleic*  
593 *Acids Research*, 46(W1):W329–W337, July 2018. ISSN 0305-1048. doi: 10.1093/nar/  
594 gky384.
- 595 Mirko Torrisi, Manaz Kaleel, and Gianluca Pollastri. Porter 5: fast, state-of-the-art ab initio  
596 prediction of protein secondary structure in 3 and 8 classes. *bioRxiv*, 2018. doi: 10.1101/  
597 289033.
- 598 Mirko Torrisi, Manaz Kaleel, and Gianluca Pollastri. Deeper profiles and cascaded recurrent  
599 and convolutional neural networks for state-of-the-art protein secondary structure predic-  
600 tion. *Scientific Reports*, 9, 2019. doi: 10.1038/s41598-019-48786-x.
- 601 Bryan A. Moyers and Jianzhi Zhang. Phylostratigraphic Bias Creates Spurious Patterns of  
602 Genome Evolution. *Molecular Biology and Evolution*, 32(1):258–267, January 2015. ISSN  
603 0737-4038, 1537-1719. doi: 10.1093/molbev/msu286.
- 604 Caroline M. Weisman, Andrew W. Murray, and Sean R. Eddy. Mixing genome annotation  
605 methods in a comparative analysis inflates the apparent number of lineage-specific genes.  
606 *bioRxiv*, 2022. doi: 10.1101/2022.01.13.476251.
- 607 Fakhri Saïda, Marc Uzan, Benoît Odaert, and Francois Bontems. Expression of highly toxic  
608 genes in *E. coli*: Special strategies and genetic tools. *Current Protein & Peptide Science*,  
609 7(1):47–56, February 2006. ISSN 1389-2037. doi: 10.2174/138920306775474095.

- 610 Fakhri Saïda. Overview on the expression of toxic gene products in *Escherichia coli*. *Current*  
611 *Protocols in Protein Science*, Chapter 5:Unit 5.19, November 2007. ISSN 1934-3663. doi:  
612 10.1002/0471140864.ps0519s50.
- 613 Germán L. Rosano and Eduardo A. Ceccarelli. Recombinant protein expression in *Es-*  
614 *cherichia coli*: Advances and challenges. *Frontiers in Microbiology*, 5:172, 2014. ISSN  
615 1664-302X. doi: 10.3389/fmicb.2014.00172.
- 616 New England Biolabs. Datasheet for t7 express competent *e. coli* (high efficiency) (c2566;  
617 lot 18). [https://www.nebiolabs.com.au/-/media/catalog/datacards-or-manuals/  
618 c2566datasheet-lot18.pdf?rev=234841213ece47a48f9da8de895ca3db&hash=  
619 CB482DAE0DA6659F3B5B7618615B4902](https://www.nebiolabs.com.au/-/media/catalog/datacards-or-manuals/c2566datasheet-lot18.pdf?rev=234841213ece47a48f9da8de895ca3db&hash=CB482DAE0DA6659F3B5B7618615B4902) (Accessed on 02/24/2022).
- 620 Sandra Harper and David W. Speicher. Purification of proteins fused to glutathione S-  
621 transferase. *Methods in Molecular Biology (Clifton, N.J.)*, 681:259–280, 2011. ISSN  
622 1940-6029. doi: 10.1007/978-1-60761-913-0\_14.
- 623 Tatsuya Niwa, Takashi Kanamori, Takuya Ueda, and Hideki Taguchi. Global analysis of  
624 chaperone effects using a reconstituted cell-free translation system. *Proc Natl Acad Sci U*  
625 *S A*, 109(23):8937–8942, Jun 2012. doi: 10.1073/pnas.1201380109.
- 626 Gustav N. Sundell and Ylva Ivarsson. Interaction analysis through proteomic phage display.  
627 *BioMed Research International*, 2014:176172, 2014. ISSN 2314-6141. doi: 10.1155/2014/  
628 176172.
- 629 Ylva Ivarsson, Roland Arnold, Megan McLaughlin, Satra Nim, Rakesh Joshi, Debashish Ray,  
630 Bernard Liu, Joan Teyra, Tony Pawson, Jason Moffat, Shawn Shun-Cheng Li, Sachdev S.  
631 Sidhu, and Philip M. Kim. Large-scale interaction profiling of PDZ domains through pro-  
632 teomic peptide-phage display using human and viral phage peptidomes. *Proceedings of*  
633 *the National Academy of Sciences*, 111(7):2542–2547, February 2014. ISSN 0027-8424,  
634 1091-6490. doi: 10.1073/pnas.1312296111.
- 635 Muhammad Ali, Leandro Simonetti, and Ylva Ivarsson. Screening Intrinsically Disordered  
636 Regions for Short Linear Binding Motifs. In Birthe B. Kragelund and Karen Skriver, editors,  
637 *Intrinsically Disordered Proteins: Methods and Protocols*, Methods in Molecular Biology,  
638 pages 529–552. Springer US, New York, NY, 2020. ISBN 978-1-07-160524-0. doi: 10.  
639 1007/978-1-0716-0524-0\_27.

- 640 Yi-Hsiang Chiu, K. T. Ko, Tzu-Jing Yang, Kuen-Phon Wu, Meng-Ru Ho, Piotr Draczkowski,  
641 and Shang-Te Danny Hsu. Direct visualization of a 26 kda protein by cryo-electron mi-  
642 croscopy aided by a small scaffold protein. *Biochemistry*, 2021. doi: 10.1021/acs.biochem.  
643 0c00961.
- 644 John M. Jumper, Richard Evans, Alexander Pritzel, Tim Green, Michael Figurnov, Olaf Ron-  
645 neberger, Kathryn Tunyasuvunakool, Russ Bates, Augustin Zídek, Anna Potapenko, Alex  
646 Bridgland, Clemens Meyer, Simon A A Kohl, Andy Ballard, Andrew Cowie, Bernardino  
647 Romera-Paredes, Stanislav Nikolov, Rishub Jain, Jonas Adler, Trevor Back, Stig Pe-  
648 tersen, David A. Reiman, Ellen Clancy, Michal Zielinski, Martin Steinegger, Michalina  
649 Pacholska, Tamas Berghammer, Sebastian Bodenstern, David Silver, Oriol Vinyals, An-  
650 drew W. Senior, Koray Kavukcuoglu, Pushmeet Kohli, and Demis Hassabis. Highly ac-  
651 curate protein structure prediction with alphafold. *Nature*, 596:583 – 589, 2021. doi:  
652 10.1038/s41586-021-03819-2.
- 653 Minkyung Baek, Frank DiMaio, Ivan Anishchenko, Justas Dauparas, Sergey Ovchinnikov,  
654 Gyu Rie Lee, Jue Wang, Qian Cong, Lisa N Kinch, R Dustin Schaeffer, et al. Accurate  
655 prediction of protein structures and interactions using a three-track neural network. *Sci-*  
656 *ence*, 373(6557):871–876, 2021. doi: 10.1126/science.abj8754.
- 657 Kiersten M Ruff and Rohit V Pappu. Alphafold and implications for intrinsically disordered  
658 proteins. *Journal of Molecular Biology*, 433(20):167208, 2021. doi: 10.1016/j.jmb.2021.  
659 167208.
- 660 Vivian Monzon, Daniel H Haft, and Alex Bateman. Folding the unfoldable: using alphafold  
661 to explore spurious proteins. *Bioinformatics Advances*, 2(1):vbab043, 2022. doi: 10.1093/  
662 bioadv/vbab043.
- 663 M. B. B. Gutierrez, Cristina Bonorino, and Maurício Menegatti Rigo. Chaperism: improved  
664 chaperone binding prediction using position-independent scoring matrices. *Bioinformatics*,  
665 2020. doi: 10.1093/bioinformatics/btz670.
- 666 Kazuyo Nishihara, Masaaki Kanemori, Masanari Kitagawa, Hideki Yanagi, and Takashi Yura.  
667 Chaperone coexpression plasmids: Differential and synergistic roles of dnak-dnaj-grpe  
668 and groel-groes in assisting folding of an allergen of japanese cedar pollen, cryj2, in-

669 *escherichia coli*. *Applied and Environmental Microbiology*, 64:1694 – 1699, 1998. doi:  
670 10.1128/AEM.64.5.1694-1699.1998.

671 Kazuyo Nishihara, Masaaki Kanemori, Hideki Yanagi, and Takashi Yura. Overexpression of  
672 trigger factor prevents aggregation of recombinant proteins in *escherichia coli*. *Applied and*  
673 *Environmental Microbiology*, 66:884 – 889, 2000. doi: 10.1128/AEM.66.3.884-889.2000.

674 Hiroaki Inoue, Hiroshi Nojima, and Hiroto Okayama. High efficiency transformation of *Es-*  
675 *cherichia coli* with plasmids. *Gene*, 96(1):23–28, November 1990. ISSN 0378-1119. doi:  
676 10.1016/0378-1119(90)90336-p.

677 Joseph Sambrook and David W. Russell. The Inoue Method for Preparation and Transforma-  
678 tion of Competent *E. Coli*: “Ultra-Competent” Cells. *Cold Spring Harbor Protocols*, 2006  
679 (1):pdb.prot3944, January 2006. ISSN 1940-3402, 1559-6095. doi: 10.1101/pdb.prot3944.
